# Supplementary material for: Species Distribution, Antifungal Susceptibility, and Molecular Epidemiology of Candida Species Causing Candidemia in a Tertiary Care Hospital in Bangkok, Thailand
Source: MDPI journal article supplement (doi:10.3390/jof7070577), 2021-07-19
Supplement: s1 [file s1]

### Supplementary materials

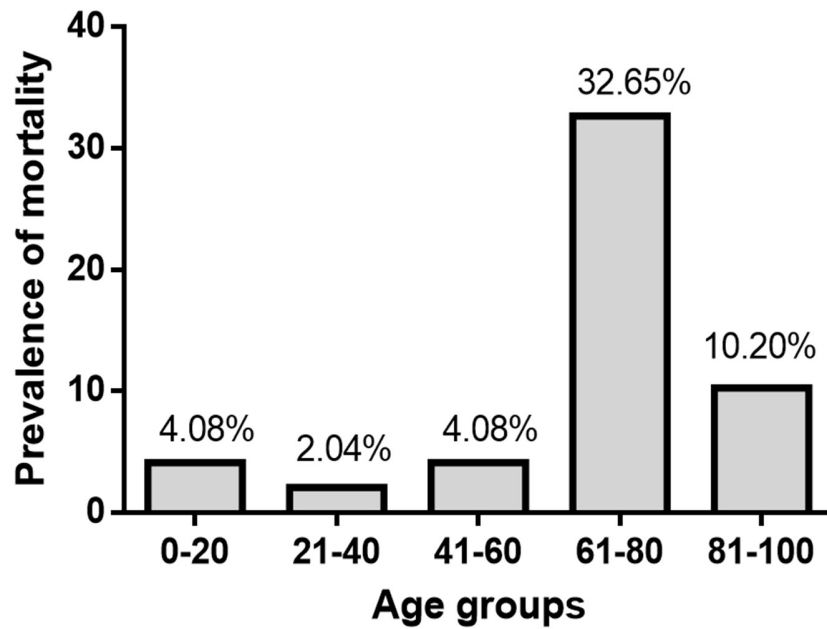

Figure S1. Mortality rate by age group among patients with candidemia.

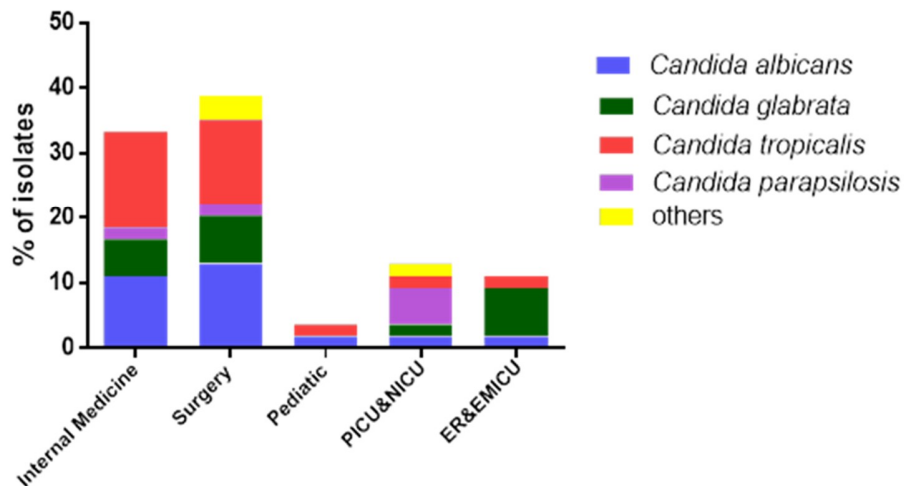

Figure S2. The composition of *Candida* species isolated from blood culture in different hospital units.

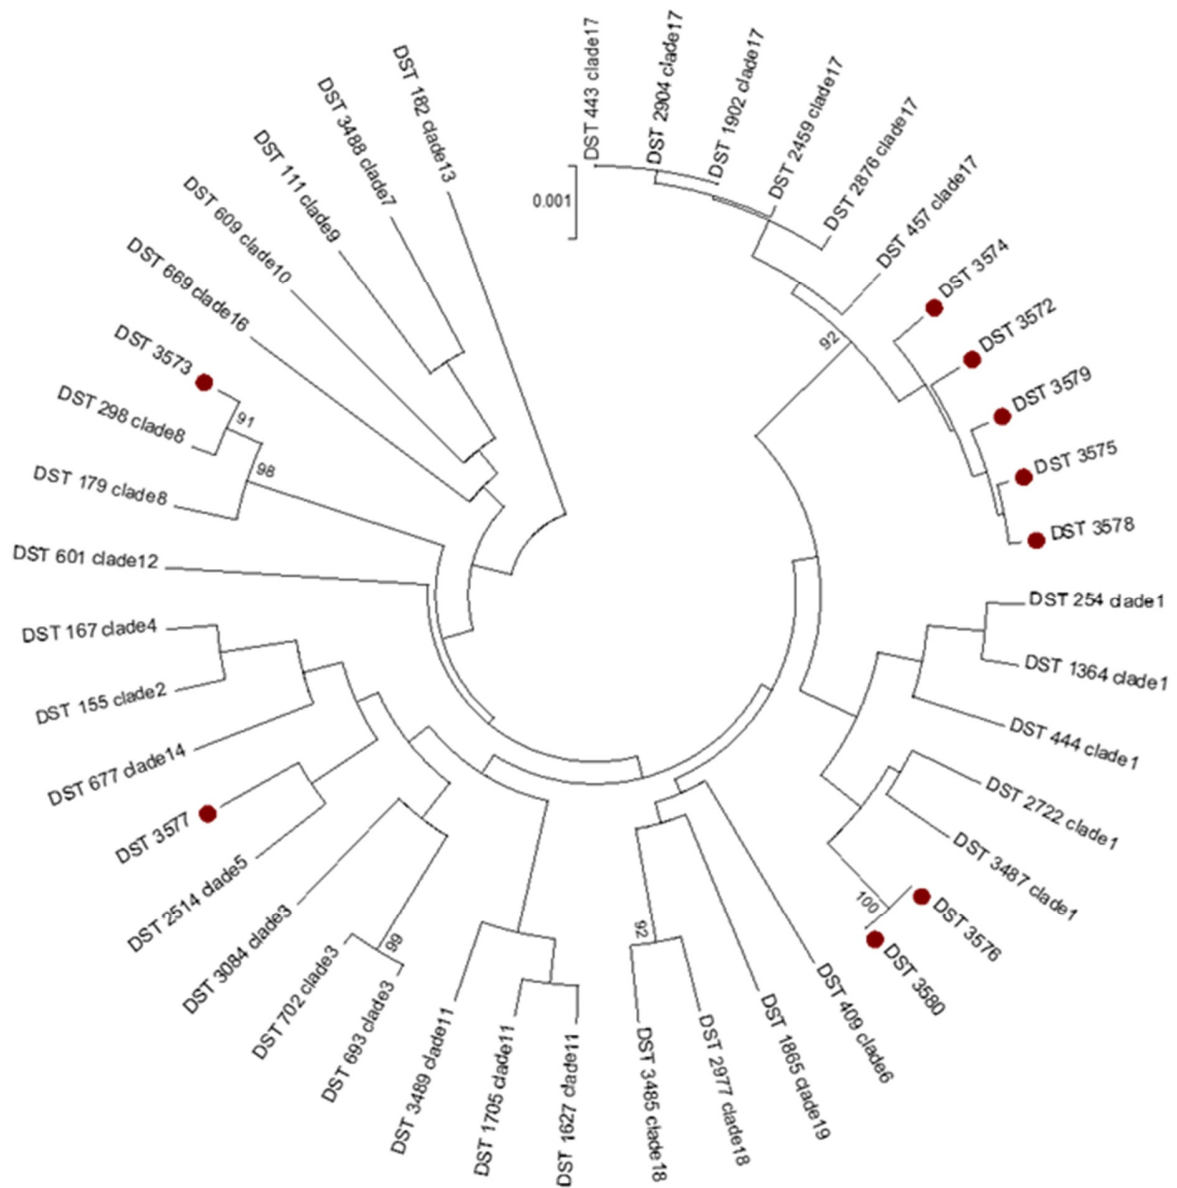

**Figure S3.** A phylogram was constructed via the unweighted pair group method with arithmetic mean based on the concatenated sequence of seven loci of *Candida albicans*. Clades were assigned by comparing the sequences obtained in this study to the reference sequences. Each sequence type in this study is represented as a brown dot.

**Table S1.** Primer sequence and PCR condition

| Primer name                        | Primer Sequence (5' – 3')       | Product size (bp) | Annealing temperature (°C) | Ref  |
|------------------------------------|---------------------------------|-------------------|----------------------------|------|
| ITS-4                              | 5'-TCCTCCGCTTATTGATATGC-3'      | 520-871           | 55                         | (8)  |
| ITS-5                              | 5'-GGAAGTAAAAGTCGTAACAAGG-3'    |                   |                            |      |
| <i>Candida albicans</i> MLST loci. |                                 |                   |                            |      |
| AAT1a-F                            | 5'-ACTCAAGCTAGATTTTTTGGC-3'     | 478               | 55                         | (9)  |
| AAT1a-R                            | 5'-CAGCAACATGATTAGCCC-3'        |                   |                            |      |
| ACC1-F                             | 5'-GCAAGAGAAATTTTAATTCAATG-3'   | 519               | 55                         | (9)  |
| ACC1-R                             | 5'-TTCATCAACATCATCCAAGTG-3'     |                   |                            |      |
| ADP1-F                             | 5'-GAGCCAAGTATGAATGATTTG-3'     | 537               | 55                         | (9)  |
| ADP1-R                             | 5'-TTGATCAACAAACCCGATAAT-3'     |                   |                            |      |
| MPI b-F                            | 5'-ACCAGAAATGGCCATTGC-3'        | 486               | 55                         | (9)  |
| MPI b-R                            | 5'-GCAGCCATGCATTCAATTAT-3'      |                   |                            |      |
| SYA1-F                             | 5'-AGAAGAATTGTTGCTGTTACTG-3'    | 543               | 55                         | (9)  |
| SYA1-R                             | 5'-GTTACCTTTACCACCAGCTTT-3'     |                   |                            |      |
| VPS13-F                            | 5'-TCGTTGAGAGATATTCGACTT-3'     | 741               | 55                         | (9)  |
| VPS13-R                            | 5'-ACGGATGGATCTCCAGTCC-3'       |                   |                            |      |
| ZWF1b-F                            | 5'-GTTTCATTTGATCCTGAAGC-3'      | 702               | 55                         | (9)  |
| ZWF1b-R                            | 5'-GCCATTGATAAGTACCTGGAT-3'     |                   |                            |      |
| <i>Candida glabrata</i> MLST loci. |                                 |                   |                            |      |
| FKS-F                              | 5'-GTCAAATGCCACAACAACAACCT-3'   | 589               | 55                         | (11) |
| FKS-R                              | 5'-AGCACTTCAGCAGCGTCTTCAG-3'    |                   |                            |      |
| LEU2-F                             | 5'-TTTCTTGTATCCTCCCATTTGTTCA-3' | 512               | 54                         | (11) |
| LEU2-R                             | 5'-ATAGGTAAAGGTGGGTTGTGTTGC-3'  |                   |                            |      |
| NMT1-F                             | 5'-GCCGGTGTGGTGTTCCTGCTC-3'     | 607               | 59                         | (11) |
| NMT1-R                             | 5'-CGTTACTGCGGTGCTCGGTGTCG-3'   |                   |                            |      |
| TRP1-F                             | 5'-AATTGTTCCAGCGTTTTTGT-3'      | 419               | 50                         | (11) |
| TRP1-R                             | 5'-GACCAGTCCAGCTCTTTCAC-3'      |                   |                            |      |
| UGP1-F                             | 5'-TTTCAACACCGACAAGGACACAGA-3'  | 616               | 57                         | (11) |

|                                      |                                 |     |    |      |
|--------------------------------------|---------------------------------|-----|----|------|
| UGP1-R                               | 5'-TCGGACTTCACTAGCAGCAAATCA-3'  |     |    |      |
| URA3-F                               | 5'-AGCGAATTGTTGAAGTTGGTTGA-3'   | 602 | 53 | (11) |
| URA3-R                               | 5'-AATTCGGTTGTAAGATGATGTTGC-3'  |     |    |      |
| <i>Candida tropicalis</i> MLST loci. |                                 |     |    |      |
| ICL1-F                               | 5'-CAACAGATTGGTTGCCATCAGAGC-3'  | 737 | 52 | (10) |
| ICL1-R                               | 5'-CGAAGTCATCAACAGCCAAAGCAG-3'  |     |    |      |
| MDR1-F                               | 5'-TGTTGGCATTACCCCTTCCT-3'      | 663 | 52 | (10) |
| MDR1-R                               | 5'-TGGAGCACCAAACAATGGGA-3'      |     |    |      |
| SAPT2-F                              | 5'-CAACGATCGTGGTGCTG-3'         | 658 | 52 | (10) |
| SAPT2-R                              | 5'-CACTGGTAGCTGAAGGAG-3'        |     |    |      |
| SAPT4-F                              | 5'-TGCTTCTCCTACAACCTTCACCTCC-3' | 483 | 52 | (10) |
| SAPT4-R                              | 5'-ATTCCCATGACTCCCTGAGCAACA-3'  |     |    |      |
| XYR1-F                               | 5'-AGTTGGTTTCGGATGTTG-3'        | 479 | 52 | (10) |
| XYR1-R                               | 5'-TCGTAAATCAAAGCACCAGT-3'      |     |    |      |
| ZWF1a-F                              | 5'-GGTGCTTCAGGAGATTAGC-3'       | 647 | 52 | (10) |
| ZWF1a-R                              | 5'-ACCTTCAGTACCAAAAGCTTC-3'     |     |    |      |
